# Supplementary material
Source: publisher figshare collection journal article supplement (https://acs.figshare.com/ndownloader/files/3843619)
Supplement: Supplementary file 1 [file 3843619]

## Supporting Information

### **Nitrogen- and Phosphorus-Doped Biocarbon with Enhanced Electrocatalytic Activity for Oxygen Reduction**

*Xin Gong<sup>1,2</sup>, Shanshan Liu<sup>1</sup>, Chuying Ouyang<sup>2</sup>, Peter Strasser<sup>3</sup>, and Ruizhi Yang<sup>\*1</sup>*

<sup>1</sup>College of Physics, Optoelectronics and Energy & Collaborative Innovation Center of Suzhou Nano Science and Technology, Soochow University, Suzhou, Jiangsu 215006, China

<sup>2</sup>Department of Physics, Jiangxi Normal University & Key Laboratory for Advanced Functional materials of Jiangxi Province, Nanchang, 330022, China

<sup>3</sup>Department of Chemistry, Chemical Engineering Division, Technical University Berlin, 10623 Berlin, Germany

E-mail: yangrz@suda.edu.cn (R. Yang)

The thermogravimetric analysis (TGA) of the sample was performed on PerkinElmer TGA7 in air from room temperature to 950 °C with a heating rate of 5 °C min<sup>-1</sup>. It was calibrated with calcium oxalate.

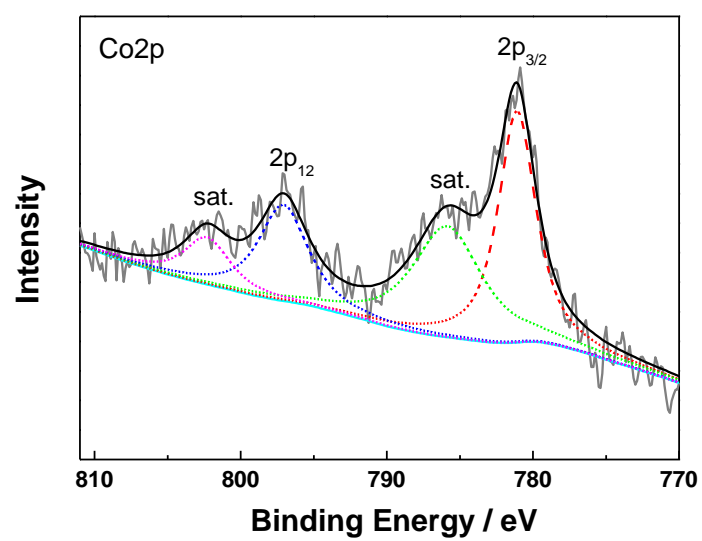

**Figure S1.** XPS spectrum for the Co 2p of Co-BC.

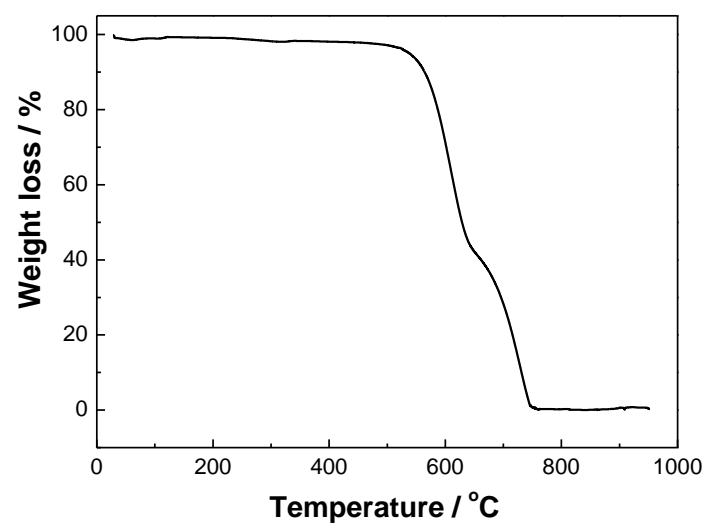

**Figure S2.** Thermogravimetric analysis of BC\*.

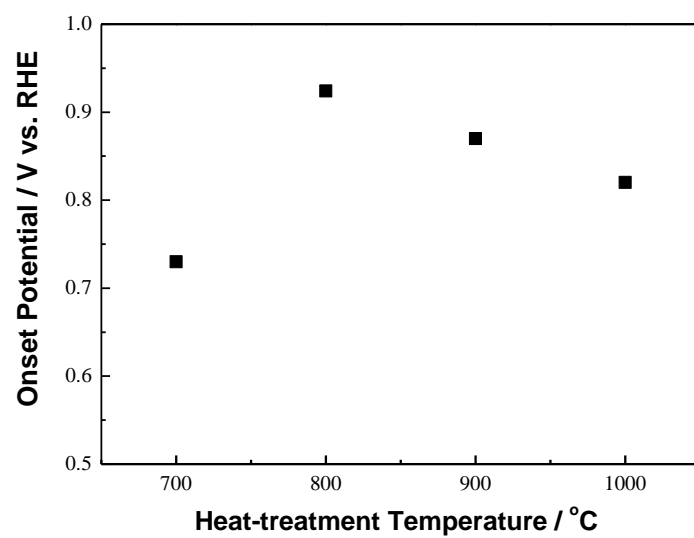

**Figure S3.** The dependence of the onset potential of BC\* for ORR on the heat-treatment temperature.

**Table S1** The dependence of N and P content in BC\* on the heat-treatment temperature

| Heat-treatment<br>temperature (°C) | N content<br>(%) | Pyridinic N/<br>total N (%) | Pyrrolic N/<br>total N (%) | P content<br>(%) | P-C/total P<br>(%) | P-O/total P<br>(%) |
|------------------------------------|------------------|-----------------------------|----------------------------|------------------|--------------------|--------------------|
| Precursor                          | 8.67             | /                           | /                          | 1.04             | /                  | /                  |
| 700                                | 6.10             | 54.48                       | 45.52                      | 1.37             | 59.50              | 40.50              |
| 800                                | 5.16             | 54.41                       | 45.59                      | 1.94             | 59.53              | 40.47              |
| 900                                | 4.73             | 54.39                       | 45.61                      | 1.60             | 59.58              | 40.42              |
| 1000                               | 3.02             | 54.44                       | 45.56                      | 1.13             | 59.56              | 40.44              |
